# Supplementary material for: Concurrent YAP/TAZ and SMAD signaling mediate vocal fold fibrosis
Source: PubMed Central journal article supplement (PMC8241934; doi:10.1038/s41598-021-92871-z), 2021-06-29
Supplement: 41598_2021_92871_MOESM1_ESM.pdf [file 41598_2021_92871_MOESM1_ESM.pdf]

Table S1. Antibodies

| Target protein                    | Provider                  | Product ID | Application | Host   | Dilution             | Conjugation   |
|-----------------------------------|---------------------------|------------|-------------|--------|----------------------|---------------|
| Primary antibody                  |                           |            |             |        |                      |               |
| $\alpha$ -SMA                     | R&D Systems               | ab21027    | IHC         | Goat   | 2 $\mu$ g/mL         |               |
| $\alpha$ -SMA                     | MilliporeSigma            | A2547      | ICC         | Mouse  | $\times$ 1,000 (ICC) |               |
| $\beta$ -actin                    | Cell Signaling Technology | 4970       | WB          | Rabbit | $\times$ 10,000 (WB) |               |
| Collagen, type I                  | Abcam                     | ab34710    | WB          | Rabbit | $\times$ 10,000      |               |
|                                   |                           |            | ICC         |        | $\times$ 500 (ICC)   |               |
| GAPDH                             | Cell Signaling Technology | 2118       | WB          | Rabbit | $\times$ 1,000 (WB)  |               |
| Lamin A/C                         | Santa Cruz Biotechnology  | sc-376248  | WB          | Mouse  | $\times$ 10,000      |               |
| SMAD2                             | Cell Signaling Technology | 5339       | WB          | Rabbit | $\times$ 1,000       |               |
| SMAD2, Ser465/467-phosphorylated  | Cell Signaling Technology | 3108       | WB          | Rabbit | $\times$ 500         |               |
| SMAD3                             | Cell Signaling Technology | 9523       | WB          | Rabbit | $\times$ 500         |               |
| SMAD3, Ser423/4235-phosphorylated | Abcam                     | ab52903    | WB          | Rabbit | $\times$ 500         |               |
| SMAD2/3                           | R&D Systems               | AF3797     | ICC         | Goat   | $\times$ 500         |               |
| TAZ                               | Atlas Antibodies          | HPA007415  | IHC, ICC    | Rabbit | $\times$ 200         |               |
| TAZ, Ser89-phosphorylated         | Cell Signaling Technology | 59971      | WB          | Rabbit | $\times$ 500         |               |
| YAP/TAZ*                          | Cell Signaling Technology | 8418       | WB          | Rabbit | $\times$ 500         |               |
| YAP                               | Santa Cruz Biotechnology  | sc-101199  | ICC         | Mouse  | $\times$ 100 (ICC)   |               |
|                                   |                           |            | WB          |        | $\times$ 1,000 (WB)  |               |
| YAP                               | Cell Signaling Technology | 14074      | IHC         | Rabbit | $\times$ 100         |               |
| YAP, Ser127-phosphorylated        | Cell Signaling Technology | 13008      | WB          | Rabbit | $\times$ 500         |               |
| Secondary Antibody                |                           |            |             |        |                      |               |
| Goat IgG                          | Thermo Fisher Scientific  | A21447     | IHC, ICC    | Donkey | $\times$ 2,000       | AlexaFluor647 |
| Mouse IgG                         | Thermo Fisher Scientific  | A31570     | IHC, ICC    | Donkey | $\times$ 2,000       | AlexaFluor555 |
| Mouse IgG                         | Cell Signaling Technology | 7076       | WB          | Horse  | $\times$ 20,000      | HRP           |
| Rabbit IgG                        | Thermo Fisher Scientific  | A31572     | IHC         | Donkey | $\times$ 2,000       | AlexaFluor555 |
| Rabbit IgG                        | Thermo Fisher Scientific  | A32790     | ICC         | Donkey | $\times$ 2,000       | AlexaFluor488 |
| Rabbit IgG                        | Cell Signaling Technology | 7074       | WB          | Goat   | $\times$ 20,000      | HRP           |

IHC: Immunohistochemistry. ICC: Immunocytochemistry. WB: Western blotting.

\*, anti-YAP/TAZ antibody was used to detect TAZ in Western blotting.

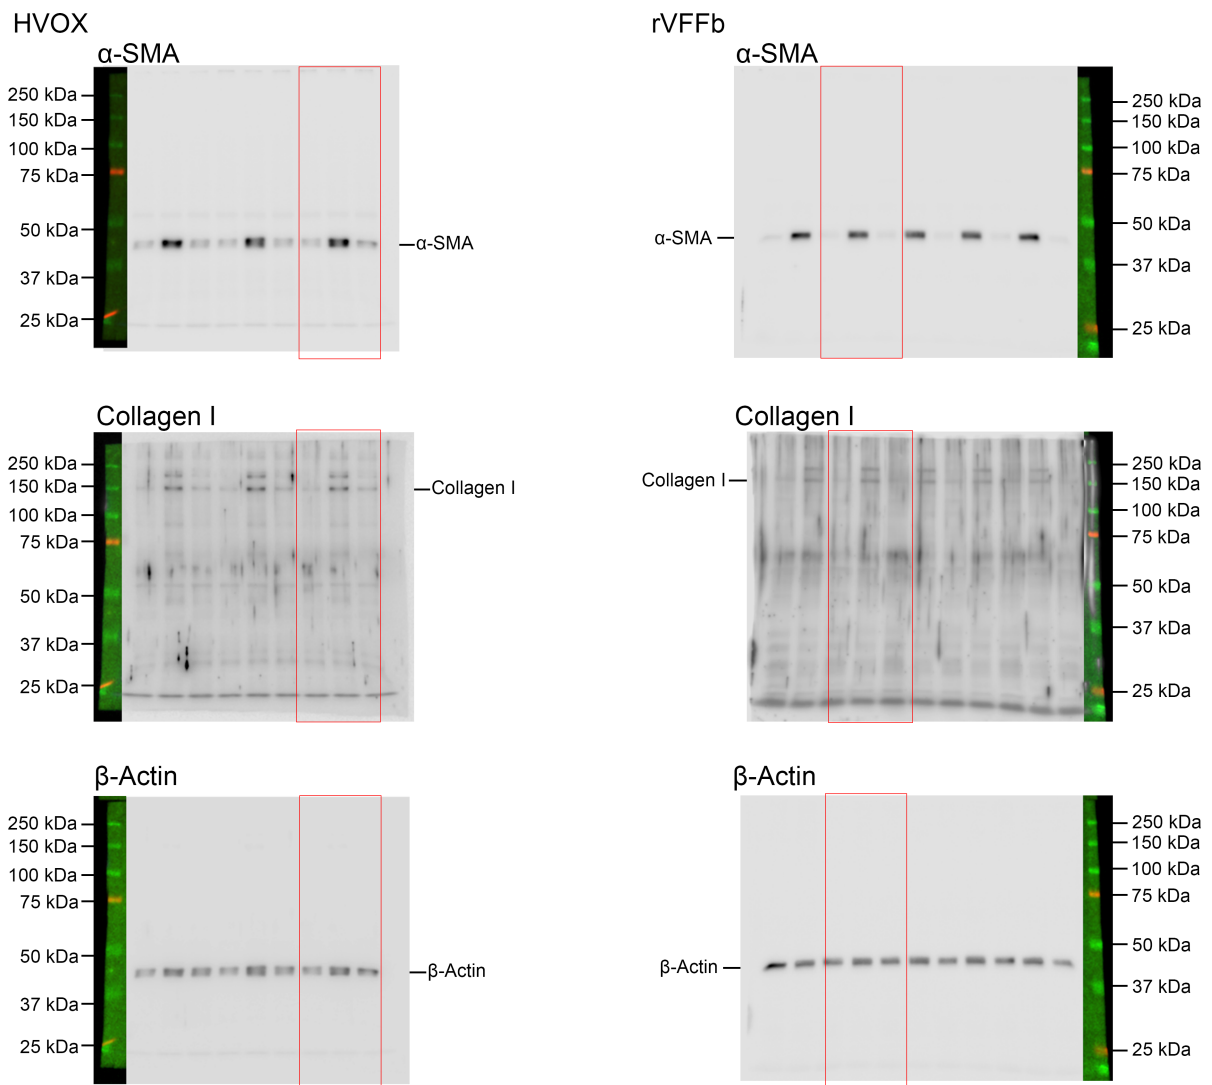

Figure S1. Original images of Western blots in Figure 4p.

Blots denoted by the red rectangulars were cropped and are shown in the Figure 4p.

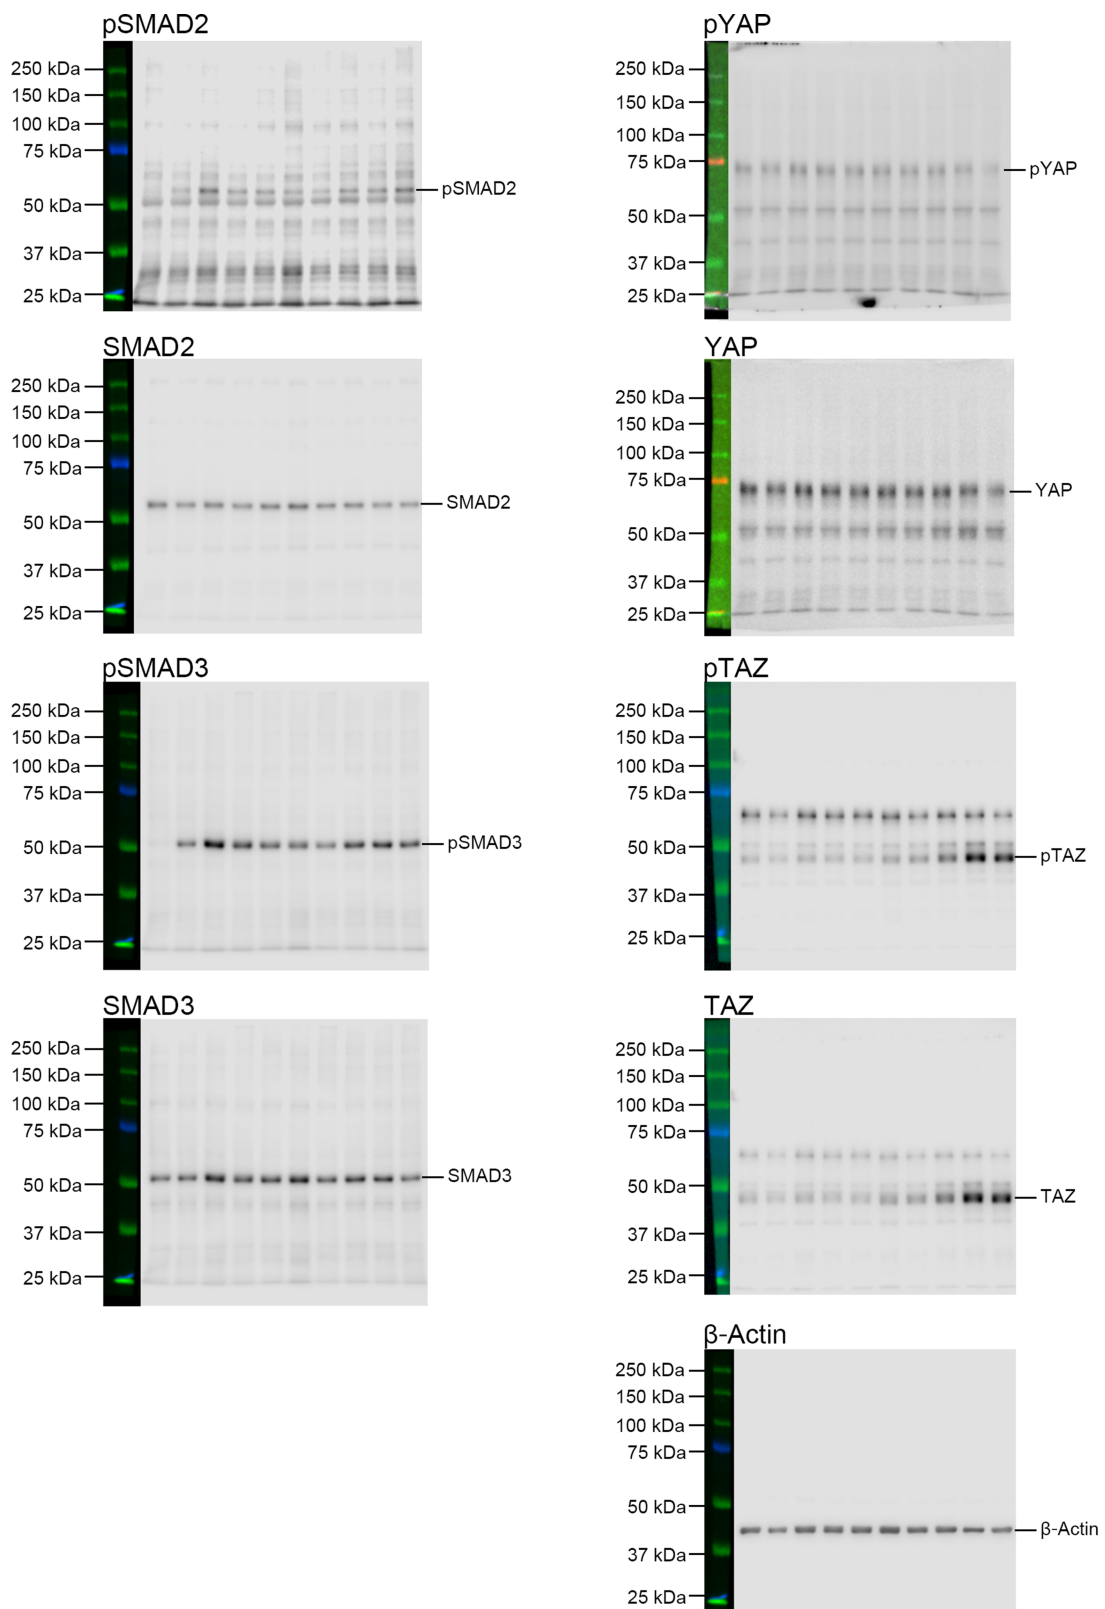

Figure S2. Original images of Western blots in Figure 6b.

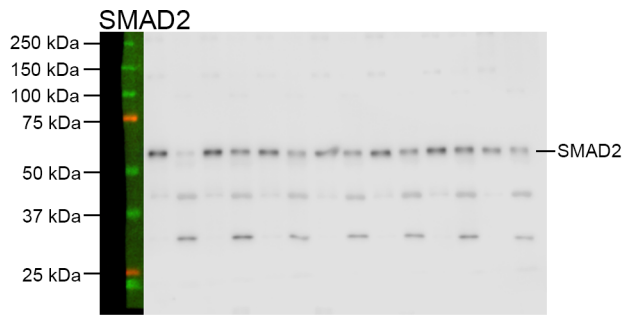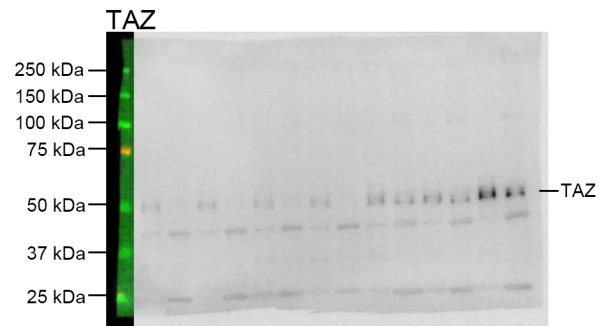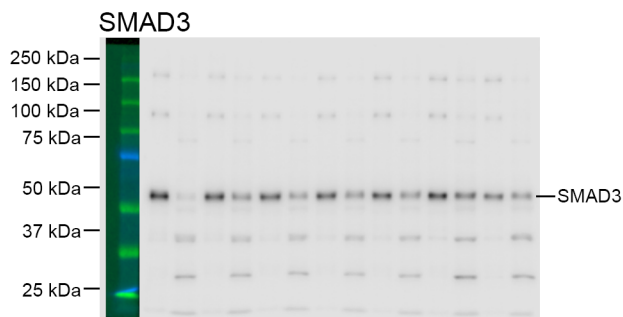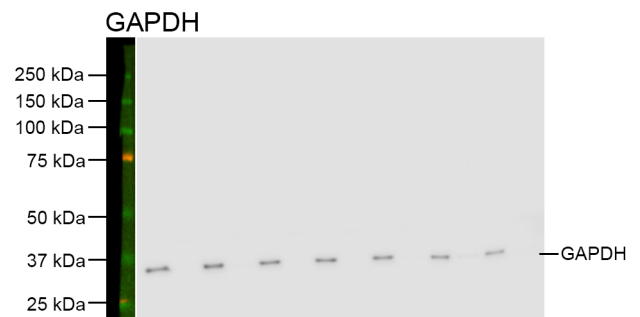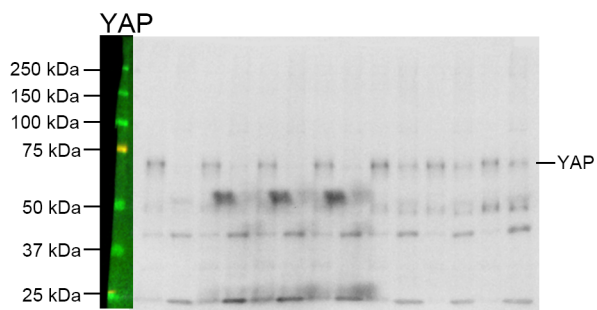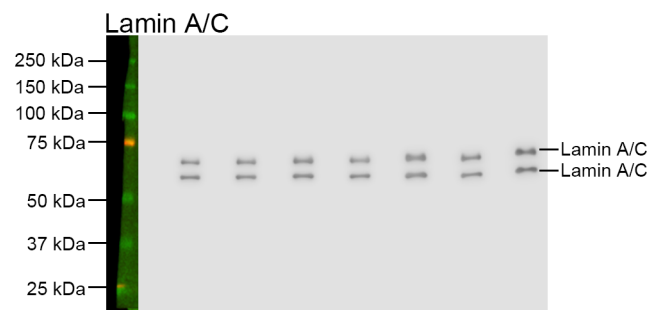

Figure S3. Original images of Western blots in Figure 6c.

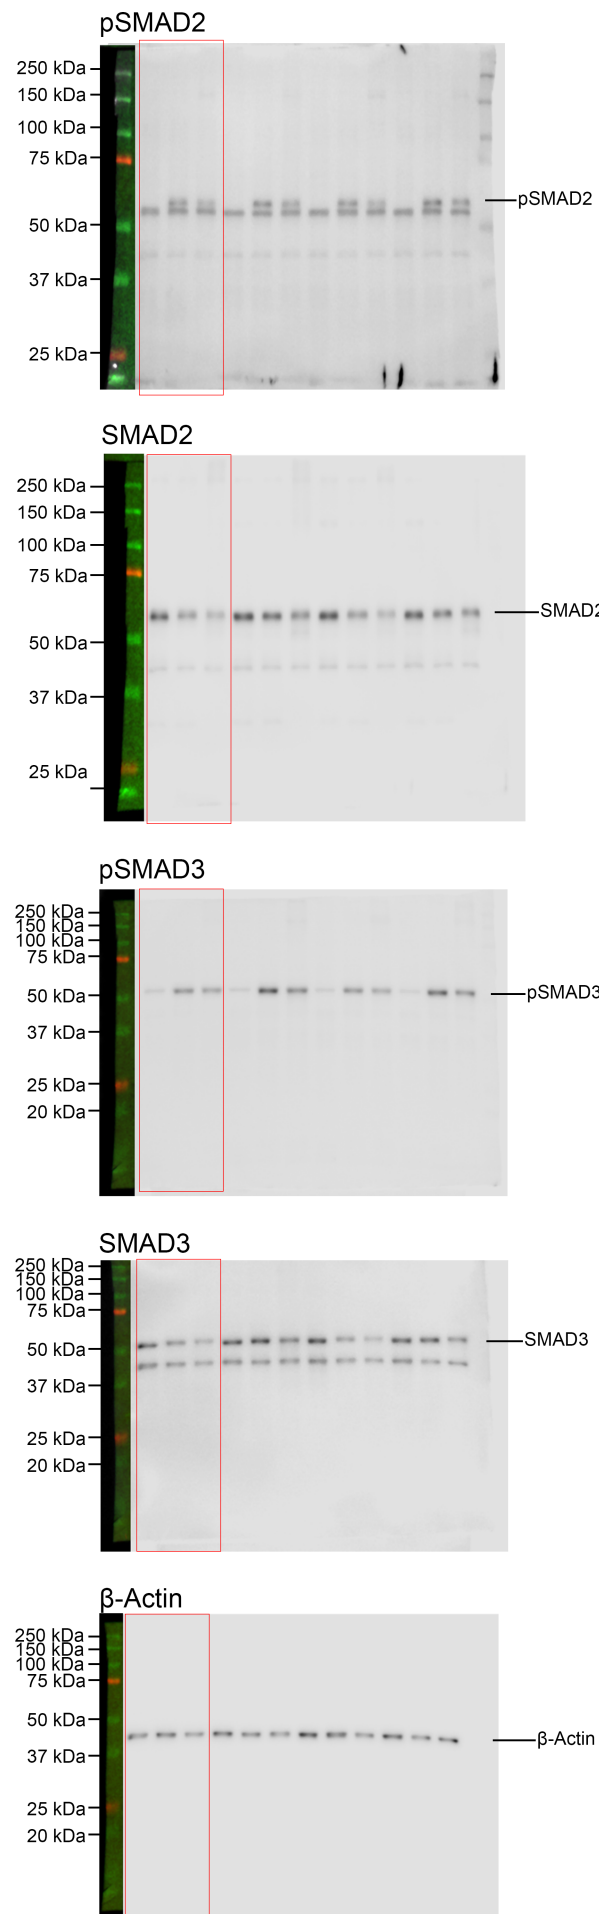

Figure S4. Original images of Western blots in Figure 8a.

Blots denoted by the red rectangles were cropped and are shown in the Figure 8a.
